# Supplementary material for: The Roles of the 5′ and 3′ Untranslated Regions in Human Astrovirus Replication
Source: MDPI journal article supplement (doi:10.3390/v15061402), 2023-06-20
Supplement: s1 [file s1]

**Table S1:** Primers used for the construction of Human Astrovirus 1 mutant viruses and dual-reporter replicons

|                        |                                                                                                             |
|------------------------|-------------------------------------------------------------------------------------------------------------|
| HA1_del_5'UTR_SL2_F    | CTCGTTTAATGGCACACGGTGAGCCA                                                                                  |
| HA1_del_5'UTR_SL2_R    | GTGCCATTAAACGAGCAGAGAAATGTTATCT                                                                             |
| HA1_del_5'UTR_SL1_F    | ATAGCCAAGTTTACCATACAATTAACAACAAGA                                                                           |
| HA1_del_5'UTR_SL1_R    | GGTAAACTTGGCTATAGTGAGTCGTATTAGGT                                                                            |
| HA1_del_5'UTR_F        | CACTATAGATGGCACACGGTGAGCCA                                                                                  |
| HA1_del_5'UTR_R        | GTGCCATCTATAGTGAGTCGTATTAGGTATT                                                                             |
| HA1_del_3'UTR_SL1_F    | TCTTTTCTTTGATTTAATCAGAAGCAAAAAAAAA                                                                          |
| HA1_del_3'UTR_SL1_R    | AAATCAAAGAAAAGAAGGAAGCTGTACC                                                                                |
| HA1_del_3'UTR_F        | CCGAGTAGTTGATTTAATCAGAAGC                                                                                   |
| HA1_del_3'UTR_R        | AATCAACTACTCGGCGTGCCGCG                                                                                     |
| ins_fluc_ORF1_HA1_F    | ACACGGTGAGATGGAAGACGCCAAAAACATAAAG                                                                          |
| ins_fluc_ORF1_HA1_R    | TATGGCTCACCGTGTGCCATTTACAATTTGGACTTTCCGCCC                                                                  |
| lin_HA1_ORF1_15bp_F    | ATGGCACACGGTGAGCCATAC                                                                                       |
| lin_HA1_ORF1_15bp_R    | CGTCTTCCATCTCACCGTGTGCCATCTTGTTGTTAATTGTATGGTAAACG                                                          |
| lin_2A_ORF1_HA1_F      | ATGGCACACGGTGAGCCA                                                                                          |
| lin_2A_ORF1_HA1_R      | CGTCTTCCATCTCACCGTGTGCCATCTTGTTGTTAATTGTATGGTAAACG                                                          |
| ins_2A_ORF1_HA1_F      | ACACGGTGAGATGGAAGACGCCAAAAACATAAAG                                                                          |
| Ins_2A_ORF1_HA1_R      | CTCACCGTGTGCCATAGGGCCGGGATTCTCTCCACGTCACCAGCCTGCTTCAGGAGGCTGAAGTTGGTGGCTCCGG<br>ACCCTTACAATTTGGACTTTCCGCCCT |
| HA1_del STOP_flucO2I_F | CCAAATTGGGGTCCGGAGCCACCAAC                                                                                  |
| HA1_del STOP_flucO2I_R | CGGACCCCAATTTGGACTTTCCGCCCTTCTTG                                                                            |
| HA1_ORF1_45bp ins_F    | GGTCGTGAAGCGATTACAGATGTCTGCCTGTTTCATCC                                                                      |
| HA1_ORF1_45bp ins_R    | TTTGCGCTCTTCCATATCTTTGTCAGGTTTAGAGC                                                                         |
| lin_pAVIC_45bp_F       | ATGGAAGACGCCAAAAACATAAAG                                                                                    |
| lin_pAVIC_45bp_R       | AATCGCTTCACGACCACG                                                                                          |
| Lin_ORF2_GFP/nluc_F    | AAATCAGTCAAGATTACAGTCAATT                                                                                   |
| Lin_ORF2_GFP/nluc_R    | ATCTCGGCCCTAGATTGT                                                                                          |
| Ins_GFP/nluc_F         | TCTAGGGGCCGAGATATGGTGTCCAAGGGCGAAGAGC                                                                       |
| Ins_GFP/nluc_R         | AATCTTGACTGATTTTCACGCCAGAATGCGTTTCG                                                                         |
| HA1_GDG_Muta_F         | GGAGATGGGAGGCTTTCTACAACACCTTCG                                                                              |
| HA1_GDG_Muta_R         | AAGCCTCCCATCTCCATAAACTACAGTGTCAT                                                                            |



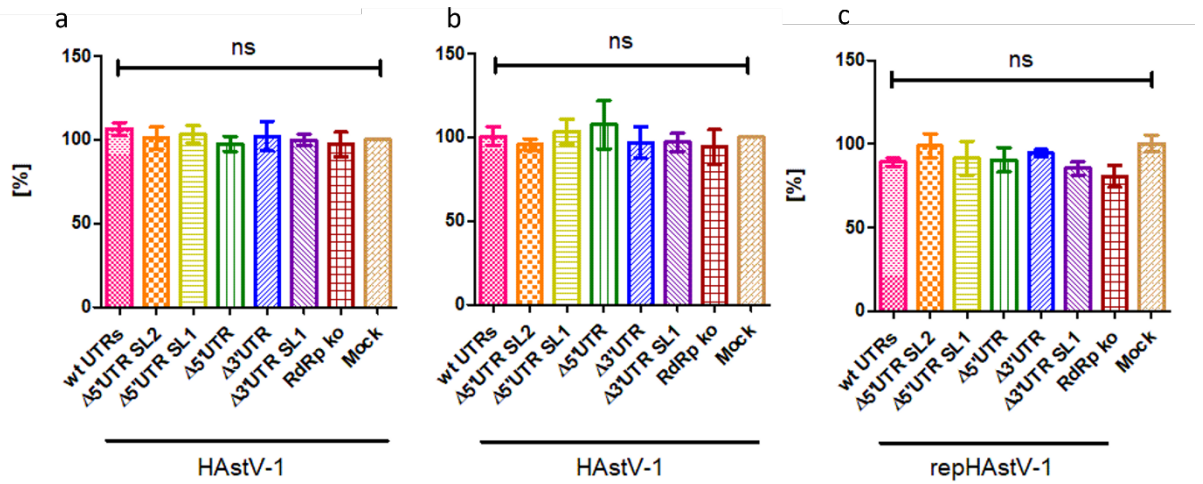

**Figure S2:** Cell viability of transfected and infected cells. (a) Transfected BSR-T7 with HuAstV-1 clone and mutants. (b) Infected CaCo-2 cells with HuAstV-1 clone and mutants. (c) Transfected BSR-T7 with HuAstV-1 replicons. All measurement were normalized to the corresponding mock. All experiments were performed trice. For statistical analysis a one-way analysis of variance (ANOVA) followed by a Tukey's multiple comparison test was performed using GraphPad Prism version 5.00 for Windows, GraphPad Software, San Diego California USA.
